# Supplementary material for: Cutin-derived oligomers induce hallmark plant immune responses
Source: PubMed Central journal article supplement — J Exp Bot. 2024 Jun 2;75(16):5146–61. doi: 10.1093/jxb/erae254 (PMC11350081; doi:10.1093/jxb/erae254), 2024-06-02
Supplement: erae254_suppl_supplementary_figures_s1-s10_tables_s1-s5.pdf [file erae254_suppl_supplementary_figures_s1-s10_tables_s1-s5.pdf]

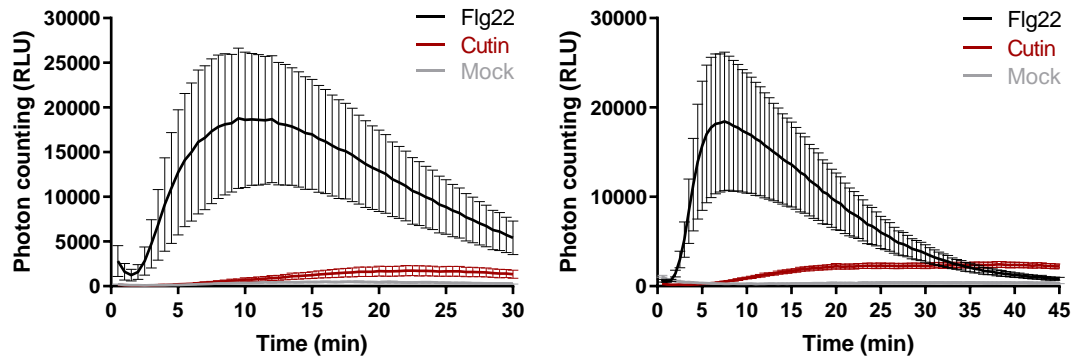

**Supplementary Fig. S1** - Luminescence-based detection of apoplastic ROS in *Arabidopsis thaliana* Col-0 seedlings upon treatment with  $2 \text{ mg} \cdot \text{mL}^{-1}$  of cutin in MiliQ water for 30 min (**A**) and 45 min (**B**). The Mock consists of the solvent. The positive control was Flg22 (100 nM).

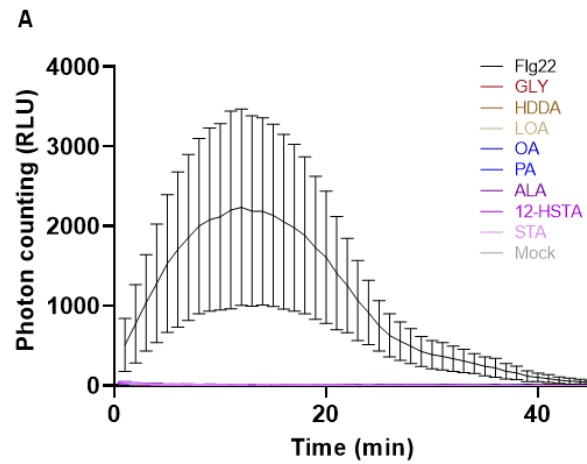

**Supplementary Fig. S2** – Luminescence-based detection of apoplastic ROS in *Arabidopsis thaliana* Col-0 seedlings upon treatment with 1 mM of commercially available pure compounds (glycerol (GLY), hexadecanedioic acid (HDDA), linoleic acid (LOA), oleic acid (OA), palmitic acid (PA), aleuritic acid (ALA), 12-hydroxystearic acid (12-HSTA) and stearic acid (STA)), in 10 % ethanol in MiliQ water for 45 min. The Mock consists of the solvent. The positive controls was Fig22 (100 nM).

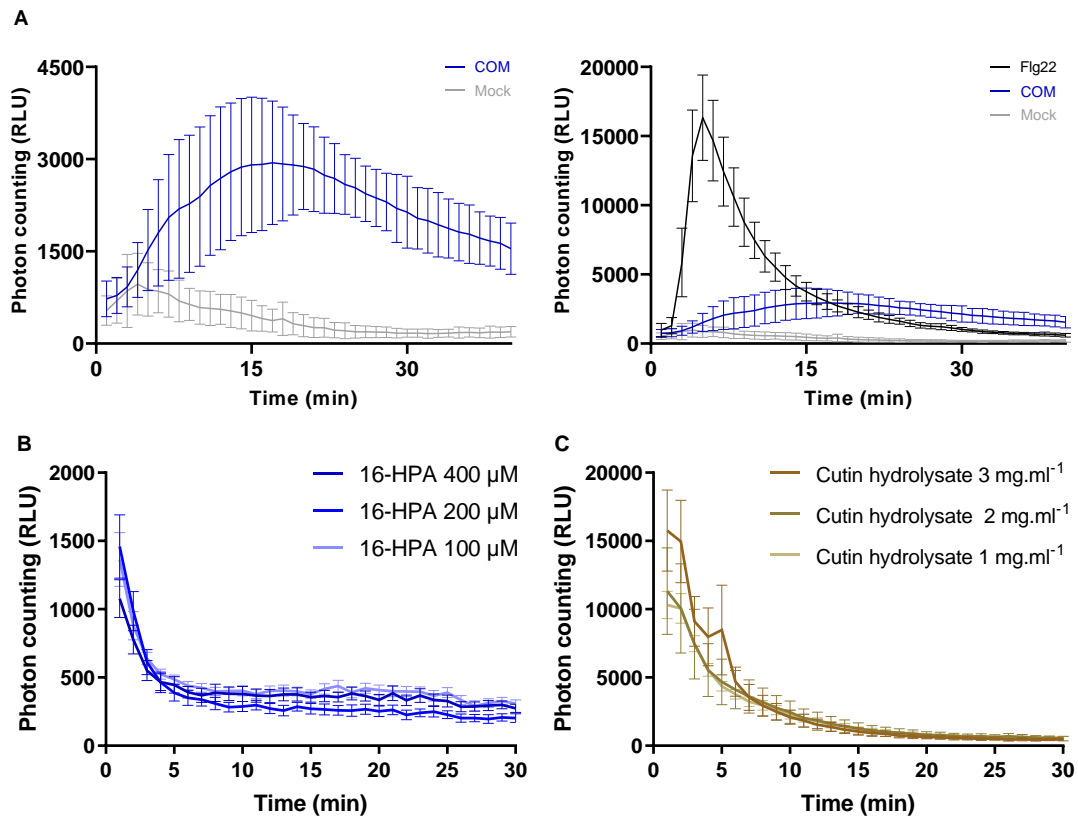

**Supplementary Fig. S3 – (A)** Luminescence-based detection of calcium influx in *Nicotiana benthamiana* leafdiscs expressing the calcium reporter aequorin, upon treatment with 2  $\text{mg}\cdot\text{mL}^{-1}$  of COM in 2 % DMSO in MiliQ water **(B)** Luminescence-based detection of calcium influx in *Arabidopsis thaliana* seedlings expressing the calcium reporter aequorin, upon treatment with increasing concentrations of 16-hydroxypalmitic acid (100  $\mu$ M, 200  $\mu$ M and 400  $\mu$ M) in 0.5 % DMSO in MiliQ; and **(C)** increasing concentrations of the hydrolysate obtained from the total alkaline hydrolysis of cutin (1  $\text{mg}\cdot\text{mL}^{-1}$ , 2  $\text{mg}\cdot\text{mL}^{-1}$  and 3  $\text{mg}\cdot\text{mL}^{-1}$ ) in 0.5 % DMSO in MiliQ. The Mock consists of the solvent. The positive control was Flg22 (100 nM).

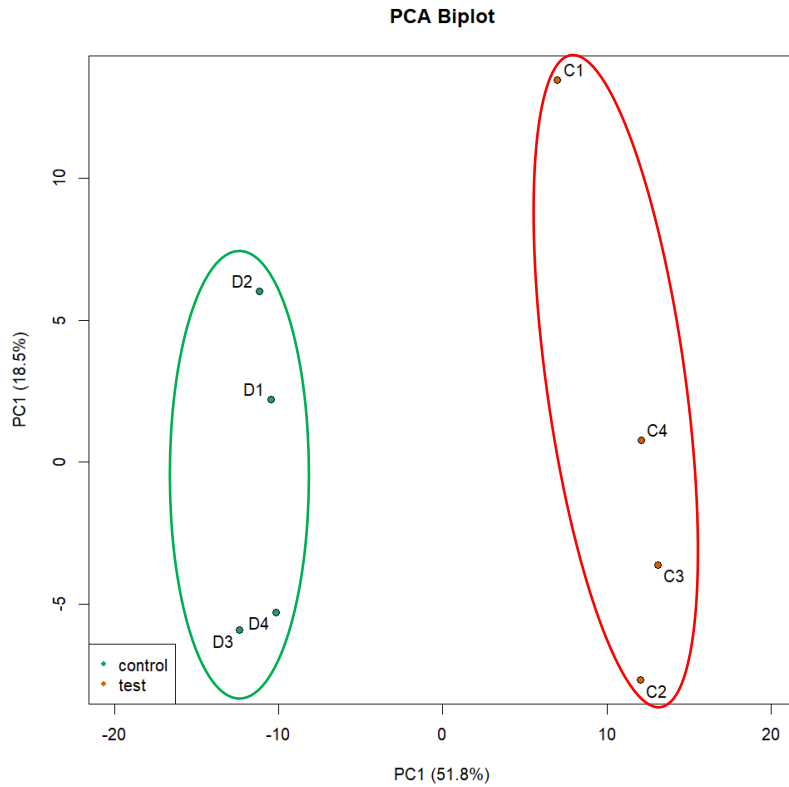

**Supplementary Fig. S4** – Principal components analysis performed with all eight samples used for the RNA-seq experiment. The figure depicts the first two main components. Ellipses enclose the regions of the space comprising the four biological replicates of each treatment: **COM (C1-C4)** and 0.5 % **DMSO** in water – mock control (**D1-D4**).

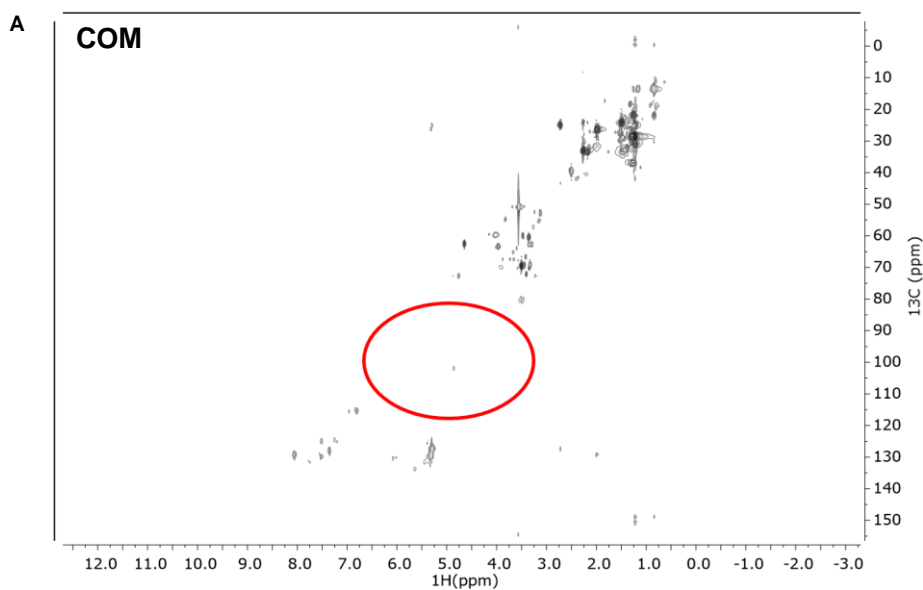

**B**

|        | pg (carbohydrate) / mg (COM) | Carbohydrate content (%)                      |
|--------|------------------------------|-----------------------------------------------|
| COM    | 41.05 ± 7.25                 | 4.11x10 <sup>-7</sup> ± 7.25x10 <sup>-8</sup> |
| COM II | 43.83 ± 25.05                | 4.38x10 <sup>-7</sup> ± 2.51x10 <sup>-7</sup> |

**Supplementary Fig. S5 – (A)** NMR characterization of 40 mg of COM. Representative magnification of the HSQC spectral region corresponding to glycosidic linkages for the COM. **(B)** Quantification of the total hydrolysable carbohydrates content present in cutin oligomeric mixtures (COMs).

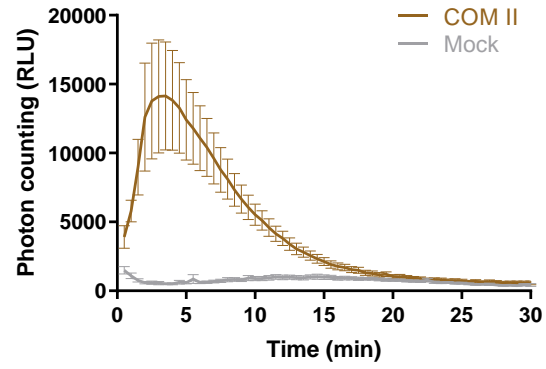

**Supplementary Fig. S6** – Luminescence-based detection of calcium influx in *Arabidopsis thaliana* seedlings expressing the calcium reporter aequorin, upon treatment with 2 mg·mL<sup>-1</sup> of COM II in 0.5 % DMSO in MiliQ water. In this assay the Mock consists of the solvent.

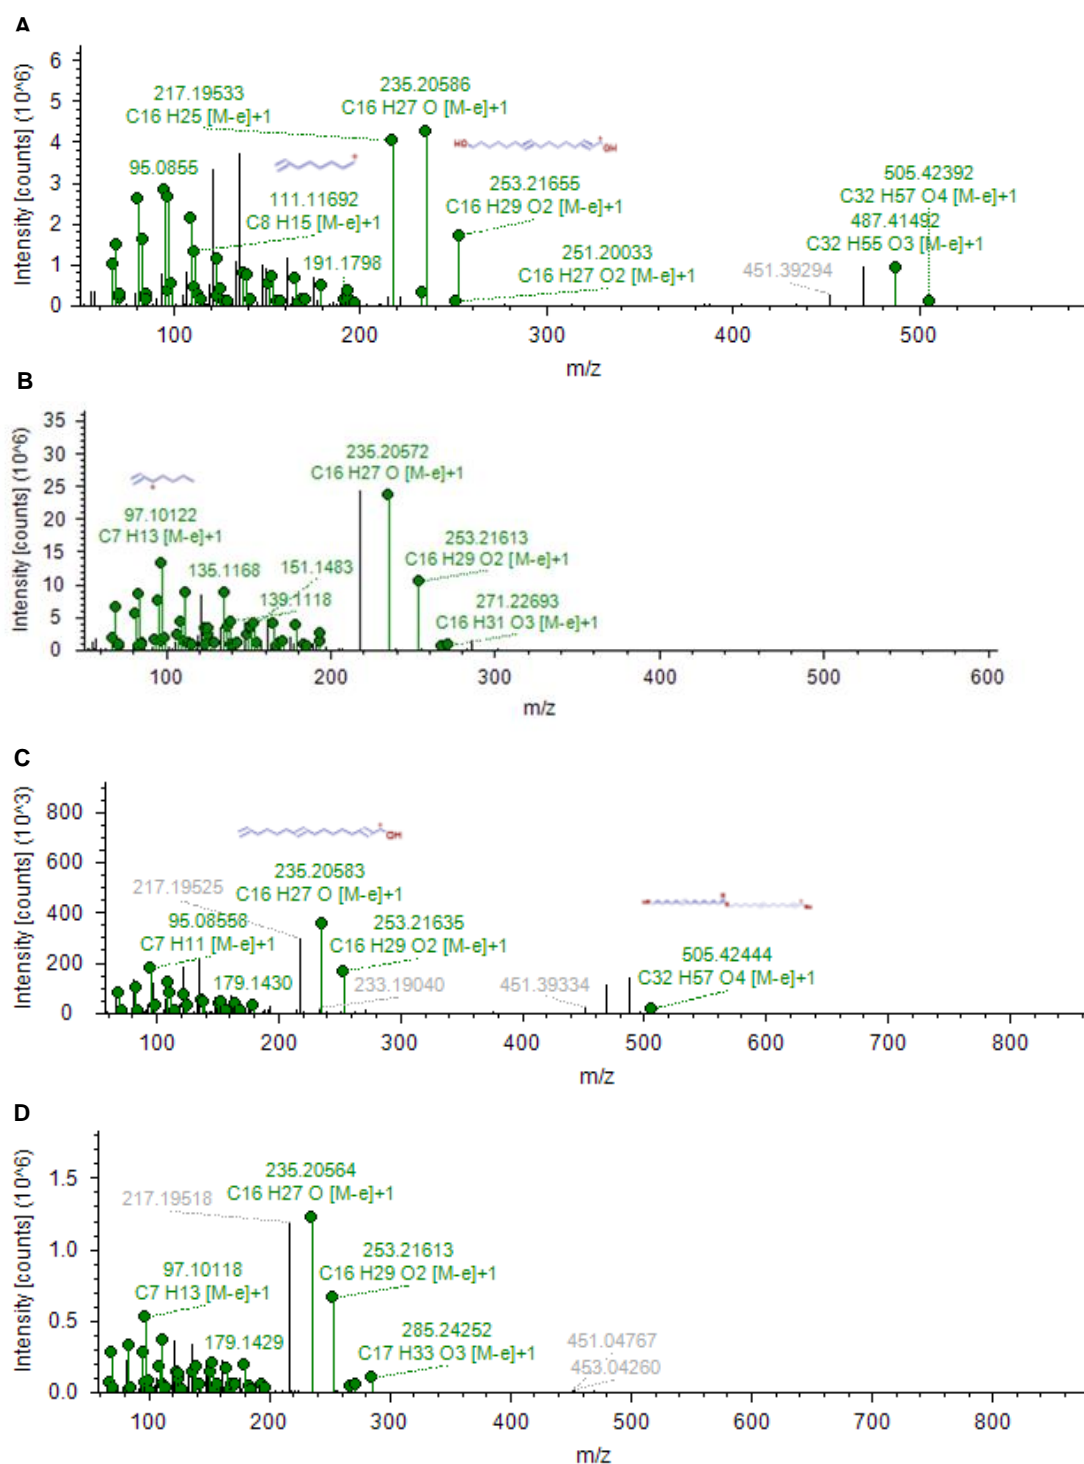

**Supplementary Fig. S7** – LC-MS/MS characterization of COM II (representative spectra for both COMs) in positive mode. MS2 spectra of the detected dimer composed by ester linked molecules of 10,16-dihydroxyhexadecanoic acid (DP2) in the non-methylated (**A**) and methylated (**B**) forms. MS2 spectra of the detected trimer composed by ester linked molecules of 10,16-dihydroxyhexadecanoic acid (DP3) in the non-methylated (**C**) and methylated (**D**) forms.

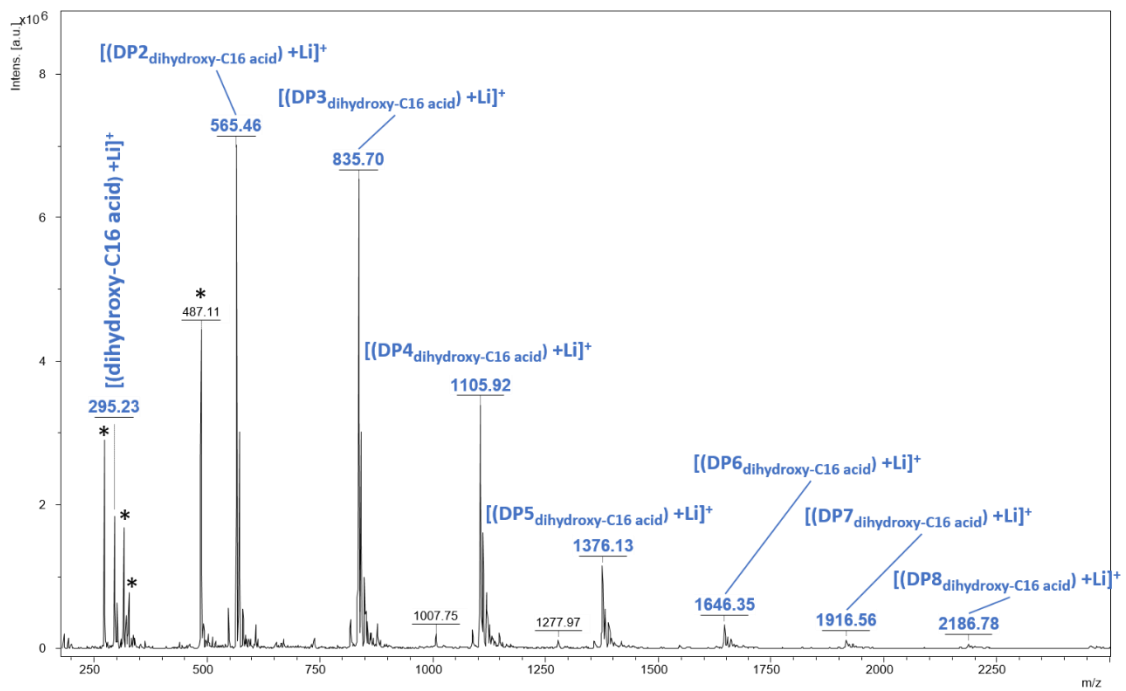

**Supplementary Fig. S8** – MALDI-TOF (+) spectrum of a reference sample containing DP's of 10,16-dihydroxyhexadecanoic acid. Annotations were deduced from exact mass measurements. Black star indicates an ion from the MALDI matrix.



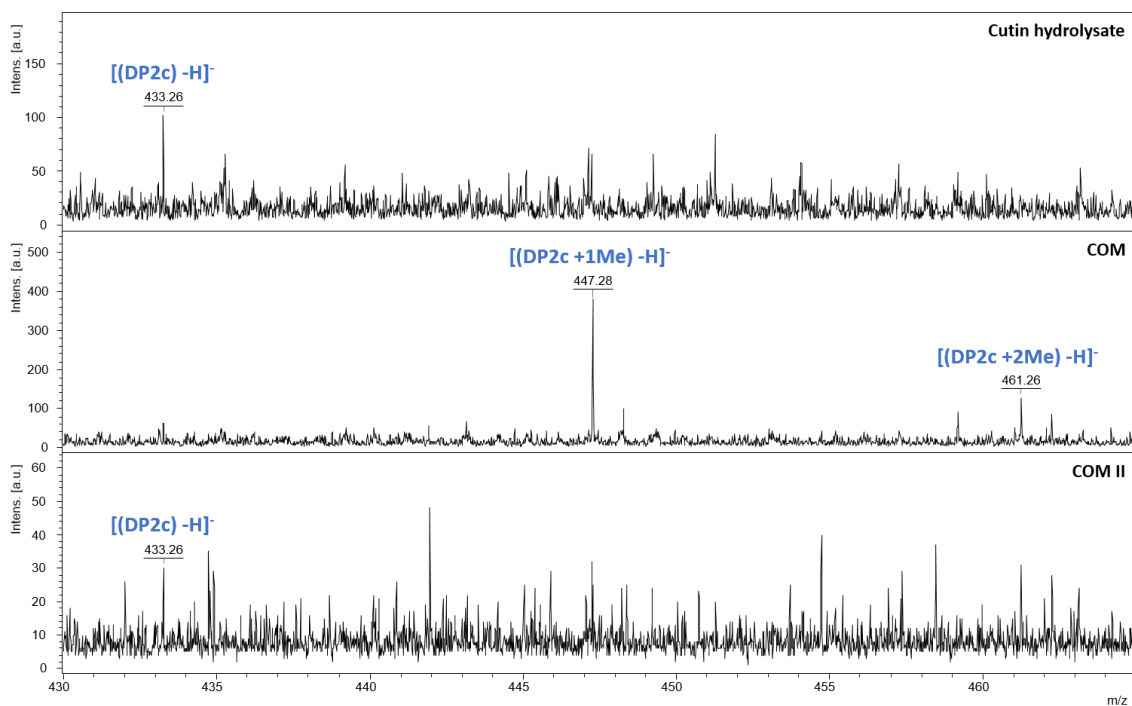

**Supplementary Fig. S9** – LDI-TOF (-) spectra of cutin hydrolysate and COMs. The range 430-465 Da corresponds to expected masses for DP2s made of one 10,16-dihydroxyhexadecanoic acid and one p-coumaric acid. Annotations were deduced from exact mass measurements.

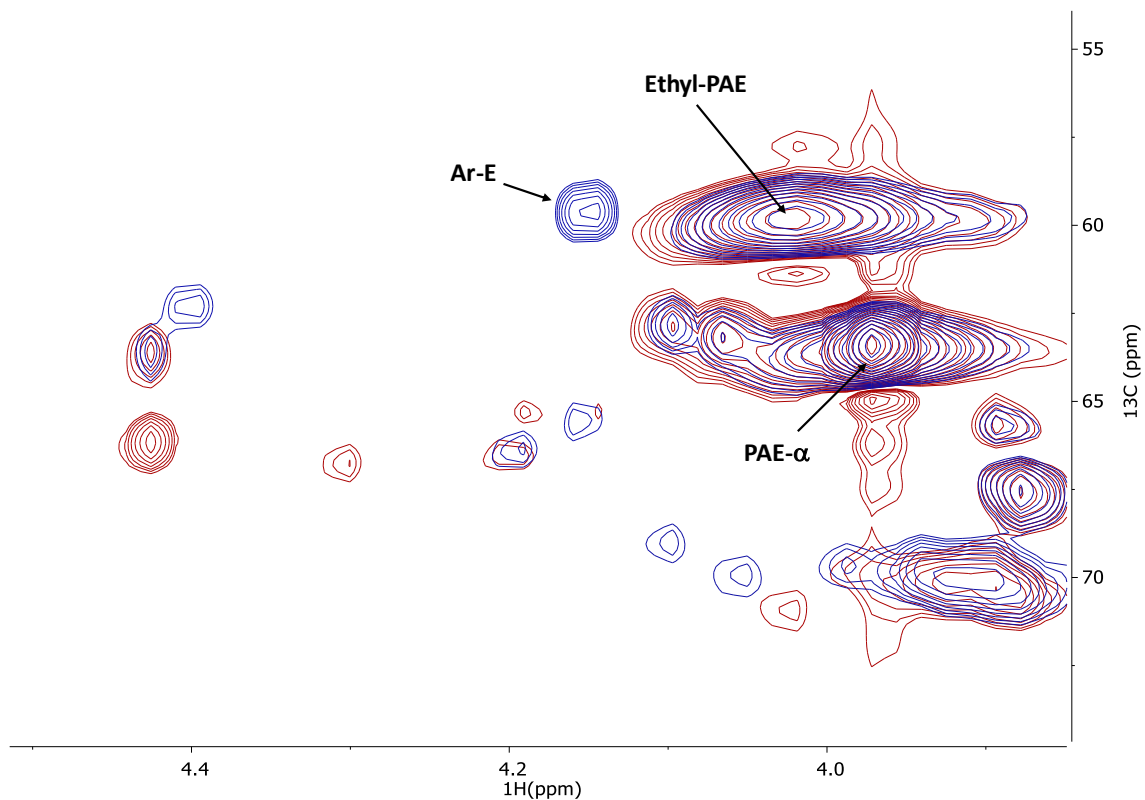

**Supplementary Fig. S10** – NMR characterization of 40 mg of COM (Blue) and COM II (Red) showing a magnification of the HSQC spectral regions comprised between 3.82 and 4.48 ppm ( $^1\text{H}$ ). Samples were 2.6-fold concentrated compared to samples used in all standard NMR analyses (15 mg).

**Supplementary Table S1** – GC-MS characterization of COM before (NH) and after alkaline hydrolysis (AH). List of the monomeric hydrolysable constituents of each sample after derivatization. Monomers that were not detected in a specific sample are labelled as *n.d.*

| Compound (X)                                               | COM NH               | COM AH                |
|------------------------------------------------------------|----------------------|-----------------------|
|                                                            | m (X) / m COM (g)    | m (X) / m COM (g)     |
| <b>Alkanoic acids</b>                                      | <b>244.36 ± 7.17</b> | <b>203.23 ± 11.79</b> |
| hexadecanoic acid <b>methyl ester</b>                      | 26.85 ± 0.71         | n.d.                  |
| 9,12-octadecadienoic acid <b>methyl ester</b>              | 41.08 ± 0.92         | n.d.                  |
| 9-octadecenoic acid <b>methyl ester</b>                    | 33.92 ± 0.67         | n.d.                  |
| octadecanoic acid <b>methyl ester</b>                      | 25.35 ± 0.74         | n.d.                  |
| hexadecanoic acid <b>tms</b>                               | 26.48 ± 0.91         | 37.73 ± 1.80          |
| 9,12-octadecadienoic acid <b>tms</b>                       | 40.02 ± 1.60         | 86.01 ± 4.96          |
| 9-octadecenoic acid <b>tms</b>                             | 27.77 ± 1.09         | 53.09 ± 3.60          |
| octadecanoic acid <b>tms</b>                               | 22.88 ± 0.84         | 26.40 ± 2.04          |
| <b>ω-Hydroxyalkanoic acids</b>                             | <b>111.15 ± 3.99</b> | <b>182.86 ± 10.33</b> |
| 16-hydroxyhexadecanoic acid <b>methyl ester</b>            |                      |                       |
| 10,16-Dihydroxyhexadecanoic acid <b>methyl ester</b>       | 37.42 ± 1.39         | 16.43 ± 2.78          |
| 9,10-epoxy-18-hydroxyoctadecanoic acid <b>methyl ester</b> |                      |                       |
| 16-hydroxyhexadecanoic acid <b>tms</b>                     | 27.71 ± 0.72         | 18.16 ± 1.39          |
| 10,16-Dihydroxyhexadecanoic acid <b>tms</b>                | 52.02 ± 2.14         | 140.32 ± 8.53         |
| 9,10-epoxy-18-hydroxyoctadecanoic acid <b>tms</b>          |                      | 23.86 ± 0.52          |
| <b>α, ω-Alkanedioic acids</b>                              | <b>10.66 ± 0.63</b>  | <b>51.85 ± 1.97</b>   |
| Nonanedioic acid <b>methyl ester</b>                       |                      |                       |
| Hexadecanedioic acid <b>methyl ester</b>                   |                      |                       |
| Nonanedioic acid <b>tms</b>                                | 10.66 ± 0.63         | 39.49 ± 0.90          |
| Hexadecanedioic acid <b>tms</b>                            | n.d.                 | 12.36 ± 1.33          |
| <b>Aromatics</b>                                           | <b>15.02 ± 2.87</b>  | <b>13.00 ± 0.59</b>   |
| 4-hydroxybenzaldehyde <b>methyl ester</b>                  |                      |                       |
| 4-coumaric acid <b>methyl ester</b>                        | 5.19 ± 0.13          | n.d.                  |
| 4-hydroxybenzaldehyde <b>tms</b>                           | 4.31 ± 0.20          | 3.77 ± 0.44           |
| 4-coumaric acid <b>tms</b>                                 | 5.87 ± 0.17          | 9.23 ± 0.19           |

**Supplementary Table S2 – List of genes uniquely induced by the COM treatment**

after comparison with seven different elicitors of PTI and seven different types of abiotic stress conditions. Genes for which there was no attributed name on the TAIR database were labelled as NA. ASI stand for the number of abiotic stresses

| Gene      | Log2 FC | padj     | ASI | Name      | Short Description                                               |
|-----------|---------|----------|-----|-----------|-----------------------------------------------------------------|
| AT3G19700 | 4.752   | 9.67E-03 | 0   | IKU2      | Leucine rich repeat (LRR) kinase                                |
| AT1G27080 | 3.582   | 2.03E-02 | 0   | ATNPF2.12 | Protein with low-affinity nitrate transporter activity          |
| AT5G07880 | 3.419   | 6.19E-10 | 0   | ATSNAP29  | Member of mammalian SNAP25 Gene Family                          |
| AT3G46070 | 3.407   | 1.37E-04 | 0   | NA        | C2H2-type zinc finger family protein                            |
| AT3G56980 | 2.815   | 6.64E-05 | 0   | BHLH039   | Basic helix-loop-helix transcription factor protein             |
| AT1G64940 | 2.637   | 2.91E-03 | 0   | CYP89A6   | Member of the CYP89A family                                     |
| AT4G36040 | 2.290   | 1.14E-37 | 0   | DJC23     | Chaperone DnaJ-domain superfamily protein                       |
| AT5G22890 | 1.967   | 7.40E-19 | 0   | STOP2     | Sensitive to proton rhizotoxicity 2.                            |
| AT5G42600 | 1.940   | 3.45E-02 | 0   | MRN1      | Oxidosqualene synthase that produces monocyclic triterpenes     |
| AT3G04530 | 1.651   | 5.10E-04 | 0   | ATPPCK2   | Arabidopsis phosphoenolpyruvate carboxylase kinase              |
| AT3G21260 | 1.646   | 2.60E-06 | 0   | GLTP3     | Glycolipid transfer protein (GLTP) family protein               |
| AT3G21270 | 1.560   | 5.18E-15 | 0   | ADOF2     | Dof zinc finger protein                                         |
| AT5G54630 | 1.534   | 3.48E-09 | 0   | NA        | Zinc finger protein-like protein                                |
| AT4G19865 | 1.474   | 1.34E-04 | 0   | NA        | Galactose oxidase/kelch repeat superfamily protein              |
| AT5G66690 | 1.434   | 2.82E-09 | 0   | UGT72E2   | UDPG:coniferyl alcohol glucosyltransferase                      |
| AT5G51500 | 1.397   | 3.88E-02 | 0   | NA        | Plant invertase/pectin methylesterase inhibitor superfamily     |
| AT2G36090 | 1.394   | 6.92E-04 | 0   | NA        | F-box family protein                                            |
| AT1G66800 | 1.385   | 2.90E-02 | 0   | NA        | NAD(P)-binding Rossmann-fold superfamily protein                |
| AT1G28470 | 1.382   | 5.47E-04 | 0   | ANAC010   | NAC domain containing protein 10                                |
| AT1G35260 | 1.355   | 3.01E-11 | 0   | MLP165    | MLP-like protein 165                                            |
| AT2G28690 | 1.257   | 6.11E-06 | 0   | NA        | TOX high mobility group box protein                             |
| AT1G64780 | 1.225   | 1.78E-02 | 0   | AMT1      | Ammonium transporter protein                                    |
| AT3G25290 | 1.194   | 1.29E-05 | 0   | NA        | Auxin-responsive family protein                                 |
| AT3G09270 | 1.090   | 1.38E-04 | 0   | ATGSTU8   | Glutathione transferase belonging to the tau class of GSTs      |
| AT5G03670 | 1.082   | 5.70E-04 | 0   | TRM28     | Histone-lysine N-methyltransferase SETD1B-like protein          |
| AT3G18400 | 1.071   | 3.32E-03 | 0   | ANAC058   | NAC domain containing protein 58                                |
| AT5G03240 | 1.063   | 4.55E-04 | 0   | UBQ3      | Ubiquitin that is attached to proteins destined for degradation |
| AT1G05530 | 1.055   | 3.40E-02 | 0   | UGT2      | Protein with glucosyltransferase activity                       |
| AT3G52360 | 1.027   | 1.80E-04 | 0   | NA        | Transmembrane protein                                           |
| AT3G14680 | 1.008   | 7.13E-03 | 0   | CYP72A14  | Putative cytochrome P450                                        |
| AT3G61410 | 1.008   | 3.84E-02 | 0   | NA        | U-box kinase family protein                                     |
| AT1G68795 | 1.005   | 1.07E-02 | 0   | CLE12     | Putative ligand homologous to the Clavata3 gene                 |

inducing the same effect.

**Supplementary Table S3** – List of genes uniquely induced by the COM treatment after comparison with seven other different elicitors of PTI, but also induced by one or more different of abiotic stress conditions. Genes for which there was no attributed name or description on the TAIR database were labelled as NA, and genes which were either not represented on the ATH1 microarray or were represented by a probe with multiple gene matches are labelled ND.

| Gene      | Log2 FC | padj     | ASI | Name      | Short Description                                                         |
|-----------|---------|----------|-----|-----------|---------------------------------------------------------------------------|
| AT3G27880 | 3.3280  | 5.38E-66 | 1   | NA        | Hypothetical protein                                                      |
| AT3G04200 | 3.0262  | 3.89E-03 | 1   | NA        | C2H2-type zinc finger family protein                                      |
| AT2G20670 | 2.3084  | 1.01E-05 | 1   | NA        | Sugar phosphate exchange                                                  |
| AT5G65790 | 2.1720  | 1.12E-09 | 1   | ATMYB68   | Putative MYB transcription factor                                         |
| AT2G27010 | 2.0167  | 8.85E-11 | 1   | CYP705A9  | Member of CYP705A                                                         |
| AT1G67030 | 1.8268  | 3.82E-06 | 1   | ZFP6      | Zinc finger protein containing only a single zinc finger                  |
| AT1G31050 | 1.7533  | 2.28E-05 | 1   | PFA1      | Pericycle factor type-a 1                                                 |
| AT4G21510 | 1.7418  | 4.24E-14 | 1   | ATFBS2    | F-box family protein                                                      |
| AT1G58170 | 1.6905  | 1.11E-02 | 1   | NA        | Disease resistance-responsive family protein                              |
| AT5G42580 | 1.5640  | 3.99E-02 | 1   | CYP705A12 | Member of the cytochrome P450 family                                      |
| AT1G22110 | 1.5603  | 2.04E-05 | 1   | NA        | Structural constituent of ribosome                                        |
| AT2G36050 | 1.4361  | 2.24E-09 | 1   | ATOFP15   | Ovate family protein 15                                                   |
| AT1G67340 | 1.4226  | 1.19E-07 | 1   | NA        | HCP-like superfamily protein with MYND-type zinc finger                   |
| AT1G35515 | 1.3600  | 9.30E-03 | 1   | HOS10     | Nuclear localized R2R3-type MYB transcription factor                      |
| AT2G17080 | 1.2715  | 1.55E-04 | 1   | NA        | Hypothetical protein                                                      |
| AT3G14660 | 1.1079  | 8.28E-05 | 1   | CYP72A13  | Putative cytochrome P450                                                  |
| AT1G17360 | 1.0928  | 9.71E-05 | 1   | NA        | Protein phosphatase 1 regulatory subunit-like protein                     |
| AT5G07870 | 3.5385  | 7.84E-83 | 2   | NA        | HXXXD-type acyl-transferase family protein                                |
| AT5G05220 | 3.2064  | 4.63E-02 | 2   | NA        | Hypothetical protein                                                      |
| AT3G28740 | 2.6127  | 1.80E-04 | 2   | CYP81D11  | Member of the cytochrome p450 family                                      |
| AT5G07860 | 2.6096  | 3.66E-59 | 2   | NA        | HXXXD-type acyl-transferase family protein                                |
| AT4G34138 | 2.3470  | 8.31E-11 | 2   | UGT73B1   | UDP-glucosyl transferase 73B1                                             |
| AT3G49690 | 1.9282  | 2.73E-07 | 2   | ATMYB84   | Putative homolog of the Blind gene in tomato                              |
| AT1G54120 | 1.7080  | 7.66E-04 | 2   | NA        | Hypothetical protein                                                      |
| AT2G39330 | 1.5299  | 2.13E-02 | 2   | JAL23     | Jacalin-related lectin 23                                                 |
| AT1G02205 | 1.4895  | 3.06E-02 | 2   | CER1      | Gene associated with production of stem epicuticular wax                  |
| AT5G48010 | 1.4732  | 5.37E-05 | 2   | ATTHAS1   | Oxidosqualene cyclase involved in the biosynthesis of thalianol           |
| AT3G13310 | 1.4728  | 3.88E-13 | 2   | DJC66     | Chaperone DnaJ-domain superfamily protein                                 |
| AT3G03840 | 1.3663  | 4.61E-03 | 2   | SAUR27    | SAUR-like auxin-responsive protein family                                 |
| AT5G67420 | 1.2773  | 8.30E-03 | 2   | ASL39     | LOB-domain protein involved in N metabolism and leaf morphogen            |
| AT5G53500 | 1.2322  | 1.54E-16 | 2   | NA        | Transducin/WD40 repeat-like superfamily protein                           |
| AT1G18330 | 1.2301  | 8.86E-03 | 2   | EPR1      | Early phytochrome responsive 1                                            |
| AT1G68440 | 1.2035  | 6.49E-19 | 2   | NA        | Transmembrane protein                                                     |
| AT3G16800 | 1.1923  | 9.57E-03 | 2   | EGR3      | Regulates microtubule organization                                        |
| AT1G15550 | 1.1772  | 1.52E-02 | 2   | ATGA3OX1  | Involved in the gibberellic acid biosynthetic pathway                     |
| AT4G05070 | 1.0033  | 1.73E-03 | 2   | WIP2      | Member of the wound-induced polypeptide (WIP) family                      |
| AT3G59940 | 2.7494  | 8.68E-21 | 3   | KFB50     | Member of the F-box KISS ME DEADLY (KMD) protein family                   |
| AT1G68360 | 1.7719  | 2.77E-02 | 3   | GIS3      | Nuclear localized member of the C2H2 family of transcription factors      |
| AT2G30130 | 1.6642  | 1.55E-05 | 3   | ASL5      | Gene similar to asymmetric leaves (AS)/lateral organ boundary (LOB) genes |
| AT5G16600 | 1.5649  | 3.06E-03 | 3   | ATMYB43   | Putative transcription factor (MYB43)                                     |
| AT3G47600 | 1.5635  | 1.87E-09 | 3   | ATMYB94   | Putative transcription factor (MYB94)                                     |
| AT1G78600 | 1.5492  | 3.70E-05 | 3   | BBX22     | Light-regulated zinc finger protein                                       |
| AT1G21680 | 1.4751  | 1.29E-03 | 3   | NA        | DPP6 N-terminal domain-like protein                                       |
| AT5G01820 | 1.3611  | 1.60E-03 | 3   | ATCIPK14  | CBL-interacting serine/threonine protein kinase                           |
| AT5G63970 | 1.2545  | 7.16E-04 | 3   | RGLG3     | Calcium-dependent phospholipid-binding protein                            |
| AT3G24310 | 2.5638  | 2.05E-08 | 4   | ATMYB71   | Snapdragon myb protein 305 homolog (myb)                                  |
| AT5G54230 | 2.3699  | 3.64E-10 | 4   | ATMYB49   | Putative transcription factor (MYB49)                                     |
| AT3G48510 | 1.9524  | 9.78E-04 | 5   | AITR2     | ABA - induced transcription repressor acting as feedback regulator in ABA |
| AT2G47890 | 1.5210  | 1.02E-07 | 5   | NA        | B-box type zinc finger protein with CCT domain                            |
| AT4G25480 | 3.4252  | 4.48E-04 | 6   | ATCBF3    | Member of the DREB subfamily A-1 of ERF/AP2 transcription factor family   |
| AT1G05100 | 2.6703  | 2.87E-17 | 6   | MAPKKK18  | Member of the MEKK subfamily                                              |
| AT5G35688 | 5.2093  | 3.42E-03 | ND  | NA        | Small protein with evidence of transcription or purifying selection       |
| AT4G22210 | 4.6102  | 1.81E-02 | ND  | LCR85     | Member of a family of small, secreted, cysteine rich proteins             |
| AT2G30615 | 4.2291  | 2.97E-03 | ND  | NA        | F-box/LRR protein                                                         |
| AT1G10220 | 3.2335  | 2.69E-06 | ND  | ZCF37     | NA                                                                        |
| AT4G15248 | 3.0468  | 7.29E-03 | ND  | BBX30     | B-box type zinc finger family protein                                     |
| AT1G72490 | 2.3606  | 2.59E-09 | ND  | DRO1      | Member of the IGT gene family with unknown function                       |
| AT2G26370 | 2.2571  | 2.03E-02 | ND  | NA        | MD-2-related lipid recognition domain-containing protein                  |
| AT5G63595 | 2.1890  | 2.26E-10 | ND  | ATFLS4    | Flavonol synthase 4                                                       |
| AT4G37700 | 1.9244  | 1.77E-02 | ND  | NA        | Hypothetical protein                                                      |
| AT1G64950 | 1.7784  | 5.54E-18 | ND  | CYP89A5   | Member of CYP89A                                                          |
| AT5G65030 | 1.7624  | 3.92E-02 | ND  | NA        | Nitric oxide synthase-interacting protein                                 |
| AT2G28160 | 1.6114  | 3.29E-03 | ND  | ATBHLH029 | Putative transcription factor regulating iron uptake responses            |
| AT2G30230 | 1.3264  | 1.96E-03 | ND  | NA        | 6,7-dimethyl-8-ribityllumazine synthase                                   |
| AT2G23690 | 1.3238  | 1.10E-03 | ND  | NA        | HTH-type transcriptional regulator                                        |
| AT4G06534 | 1.0011  | 3.85E-02 | ND  | NA        | Transmembrane protein                                                     |
| AT4G02950 | 5.4744  | 1.15E-04 | ND  | NA        | Ubiquitin family protein                                                  |
| AT5G23360 | 2.4024  | 6.64E-05 | ND  | NA        | GRAM domain-containing protein / ABA-responsive protein-related           |
| AT5G23350 | 1.9571  | 4.41E-04 | ND  | NA        | GRAM domain-containing protein / ABA-responsive protein-related           |
| AT1G05660 | 1.3890  | 1.14E-02 | ND  | NA        | Pectin lyase-like superfamily protein                                     |

**Supplementary Table S4A** – List of putative oligomeric targets for LC-MS/MS analysis, their chemical formulas and the corresponding exact mass (neutral species only).

| Oligomer                                           | Chemical Formula                                | Mass (Da)   |
|----------------------------------------------------|-------------------------------------------------|-------------|
| DP2: 10,16-dihydroxyhexadecanoic acid (2x)         | C <sub>32</sub> H <sub>62</sub> O <sub>7</sub>  | 558.444839  |
| DP2-me: 10,16-dihydroxyhexadecanoic acid (2x) + Me | C <sub>33</sub> H <sub>64</sub> O <sub>7</sub>  | 572.4604891 |
| DP3: 10,16-dihydroxyhexadecanoic acid (3x)         | C <sub>48</sub> H <sub>92</sub> O <sub>10</sub> | 828.6596185 |
| DP3-me: 10,16-dihydroxyhexadecanoic acid (3x) + Me | C <sub>49</sub> H <sub>94</sub> O <sub>10</sub> | 842.6752686 |

**Supplementary Table S4B** – List of all putatively identified oligomers (DP2 and DP3) by LC-MS/MS (+) in COMs and the corresponding detected masses.

| Species                                                                             | Detected <i>m/z</i> | COM | COM II |
|-------------------------------------------------------------------------------------|---------------------|-----|--------|
| <i>Observed in LC-MS/MS (+)</i>                                                     |                     |     |        |
| [DP2(dihydroxy-C <sub>16</sub> acid) + H] <sup>+</sup>                              | 559.46              | +   | +      |
| [DP2(dihydroxy-C <sub>16</sub> acid) + NH <sub>4</sub> ] <sup>+</sup>               | 576.49              | -   | +      |
| [DP2(dihydroxy-C <sub>16</sub> acid + Na) <sup>+</sup>                              | 581.44              | +   | +      |
| [DP2(hydroxy-C <sub>16</sub> -dioic acid) + Me + H – H <sub>2</sub> O] <sup>+</sup> | 555.46              | -   | +      |
| [DP2(hydroxy-C <sub>16</sub> -dioic acid) + Me + H] <sup>+</sup>                    | 573.47              | +   | +      |
| [DP2(hydroxy-C <sub>16</sub> -dioic acid) + Me + NH <sub>4</sub> ] <sup>+</sup>     | 590.50              | +   | +      |
| [DP2(hydroxy-C <sub>16</sub> -dioic acid) + Me + Na] <sup>+</sup>                   | 595.45              | +   | +      |
| [DP2(hydroxy-C <sub>16</sub> -dioic acid) + Me + K] <sup>+</sup>                    | 611.43              | -   | +      |
| [DP3(dihydroxy-C <sub>16</sub> acid) + H] <sup>+</sup>                              | 829.68              | -   | +      |
| [DP3(dihydroxy-C <sub>16</sub> acid) + Na] <sup>+</sup>                             | 851.66              | -   | +      |
| [DP3(dihydroxy-C <sub>16</sub> acid) + Me + H] <sup>+</sup>                         | 843.69              | -   | +      |
| [DP3(dihydroxy-C <sub>16</sub> acid) + Me + NH <sub>4</sub> ] <sup>+</sup>          | 860.72              | -   | +      |
| [DP3(dihydroxy-C <sub>16</sub> acid) + Me + Na] <sup>+</sup>                        | 865.67              | -   | +      |
| [DP3(dihydroxy-C <sub>16</sub> acid) + Me + K] <sup>+</sup>                         | 881.65              | -   | +      |

**Supplementary Table S5** – List of all putatively identified monomers and oligomers by MALDI-TOF (+) and LDI-TOF (-) in cutin hydrolysates, COMs hydrolysates and COMs.

| Species                                                              | Theoretical <i>m/z</i> | Cutin hydrolysate | COM hydrolysate | COM II hydrolysate | COM | COM II |
|----------------------------------------------------------------------|------------------------|-------------------|-----------------|--------------------|-----|--------|
| <b>Observed in MALDI-TOF(+)</b>                                      |                        |                   |                 |                    |     |        |
| [hydroxy-C <sub>16</sub> acid +Li] <sup>+</sup>                      | 279.25                 | -                 | +               | +                  | -   | +      |
| [C <sub>16</sub> -dioic acid +Li] <sup>+</sup>                       | 293.23                 | +                 | +               | +                  | -   | +      |
| [dihydroxy-C <sub>16</sub> acid +Li] <sup>+</sup>                    | 295.25                 | +                 | +               | +                  | -   | +      |
| [dihydroxy-C <sub>16</sub> acid -H+2Li] <sup>+</sup>                 | 301.25                 | +                 | +               | +                  | -   | +      |
| [hydroxy-C <sub>16</sub> -dioic acid +Li] <sup>+</sup>               | 309.22                 | +                 | +               | +                  | -   | -      |
| [dihydroxy-C <sub>16</sub> acid +1.Me +Li] <sup>+</sup>              | 309.26                 | -                 | -               | -                  | +   | +      |
| [C <sub>18</sub> -dioic acid +Li] <sup>+</sup>                       | 321.26                 | -                 | +               | +                  | -   | -      |
| [hydroxy-C <sub>18</sub> -dioic acid +Li] <sup>+</sup>               | 337.26                 | +                 | +               | +                  | +   | +      |
| [DP2(dihydroxy-C <sub>16</sub> acid) +Li] <sup>+</sup>               | 565.47                 | +                 | -               | -                  | -   | +      |
| [DP2(dihydroxy-C <sub>16</sub> acid) -H+2Li] <sup>+</sup>            | 571.47                 | +                 | -               | -                  | -   | +      |
| [DP2(dihydroxy-C <sub>16</sub> acid +1.Me) +Li] <sup>+</sup>         | 579.48                 | -                 | -               | -                  | +   | +      |
| [DP2(hydroxy-C <sub>16</sub> -dioic acid) +Li] <sup>+</sup>          | 593.42                 | +                 | -               | -                  | -   | -      |
| [DP3(dihydroxy-C <sub>16</sub> acid) +Li] <sup>+</sup>               | 835.68                 | -                 | -               | -                  | -   | +      |
| [DP3(dihydroxy-C <sub>16</sub> acid +1.Me) +Li] <sup>+</sup>         | 849.70                 | -                 | -               | -                  | -   | +      |
| <b>Observed in LDI-TOF(-)</b>                                        |                        |                   |                 |                    |     |        |
| [narengenin -H] <sup>-</sup>                                         | 271.06                 | +                 | -               | -                  | -   | +      |
| [DP2(dihydroxy-C <sub>16</sub> acid - p-coum) -H] <sup>-</sup>       | 433.26                 | +                 | -               | -                  | -   | +      |
| [DP2(dihydroxy-C <sub>16</sub> acid - p-coum +1.Me) -H] <sup>-</sup> | 447.28                 | -                 | -               | -                  | +   | -      |
| [DP2(dihydroxy-C <sub>16</sub> acid - p-coum +2.Me) -H] <sup>-</sup> | 461.29                 | -                 | -               | -                  | +   | -      |
